# Supplementary material for: Seasonal Characteristics of Forecasting Uncertainties in Surface PM2.5 Concentration Associated with Forecast Lead Time over the Beijing-Tianjin-Hebei Region
Source: Springer Nature journal article supplement (doi:10.1007/s00376-023-3060-3), 2024-03-21
Supplement: 376_2023_3060_MOESM1_ESM.pdf [file 376_2023_3060_MOESM1_ESM.pdf]

# Electronic Supplementary Material to: Seasonal Characteristics of Forecasting Uncertainties in Surface PM<sub>2.5</sub> Concentration Associated with Forecast Lead Time over the Beijing-Tianjin-Hebei Region\*

Qiuyan DU<sup>1</sup>, Chun ZHAO<sup>1,2</sup>, Jiawang FENG<sup>1</sup>, Zining YANG<sup>1</sup>, Jiamin XU<sup>1</sup>, Jun GU<sup>1</sup>,  
Mingshuai ZHANG<sup>1</sup>, Mingyue XU<sup>1</sup>, and Shengfu LIN<sup>1</sup>

<sup>1</sup>Deep Space Exploration Laboratory/School of Earth and Space Sciences, University of Science and  
Technology of China, Hefei 230026, China

<sup>2</sup>CAS Center for Excellence in Comparative Planetology, University of Science and Technology of China,  
Hefei 230026, China

**ESM to:** Du, Q. Y., and Coauthors, 2024: Seasonal characteristics of forecasting uncertainties in surface PM<sub>2.5</sub> concentration associated with forecast lead time over the Beijing-Tianjin-Hebei region. *Adv. Atmos. Sci.*, **41**(5), 801–816, <https://doi.org/10.1007/s00376-023-3060-3>.

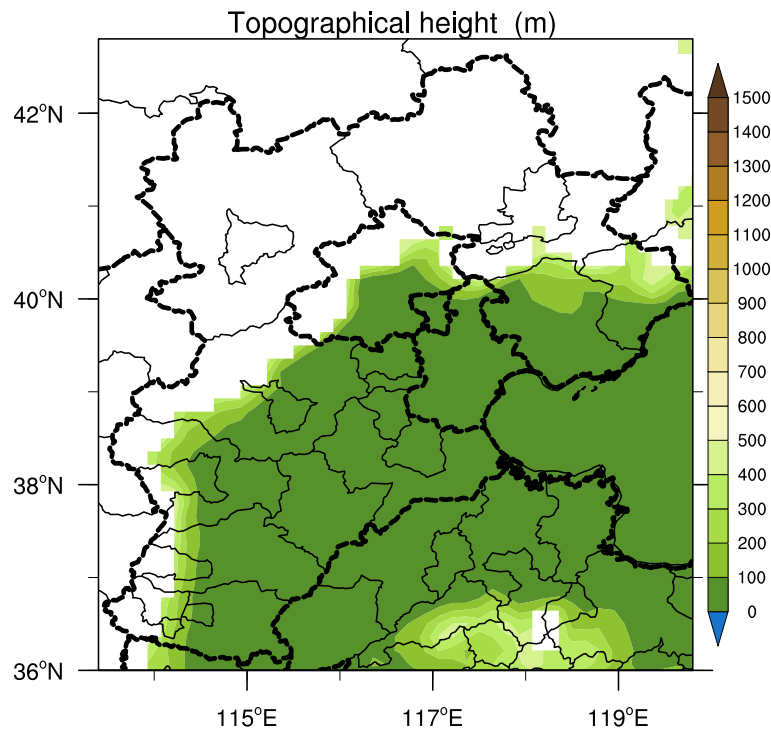

**Fig. S1.** Focused area of the analysis in this study. The shaded area denotes the area with a topographical height of less than 500 m in the BTH region.

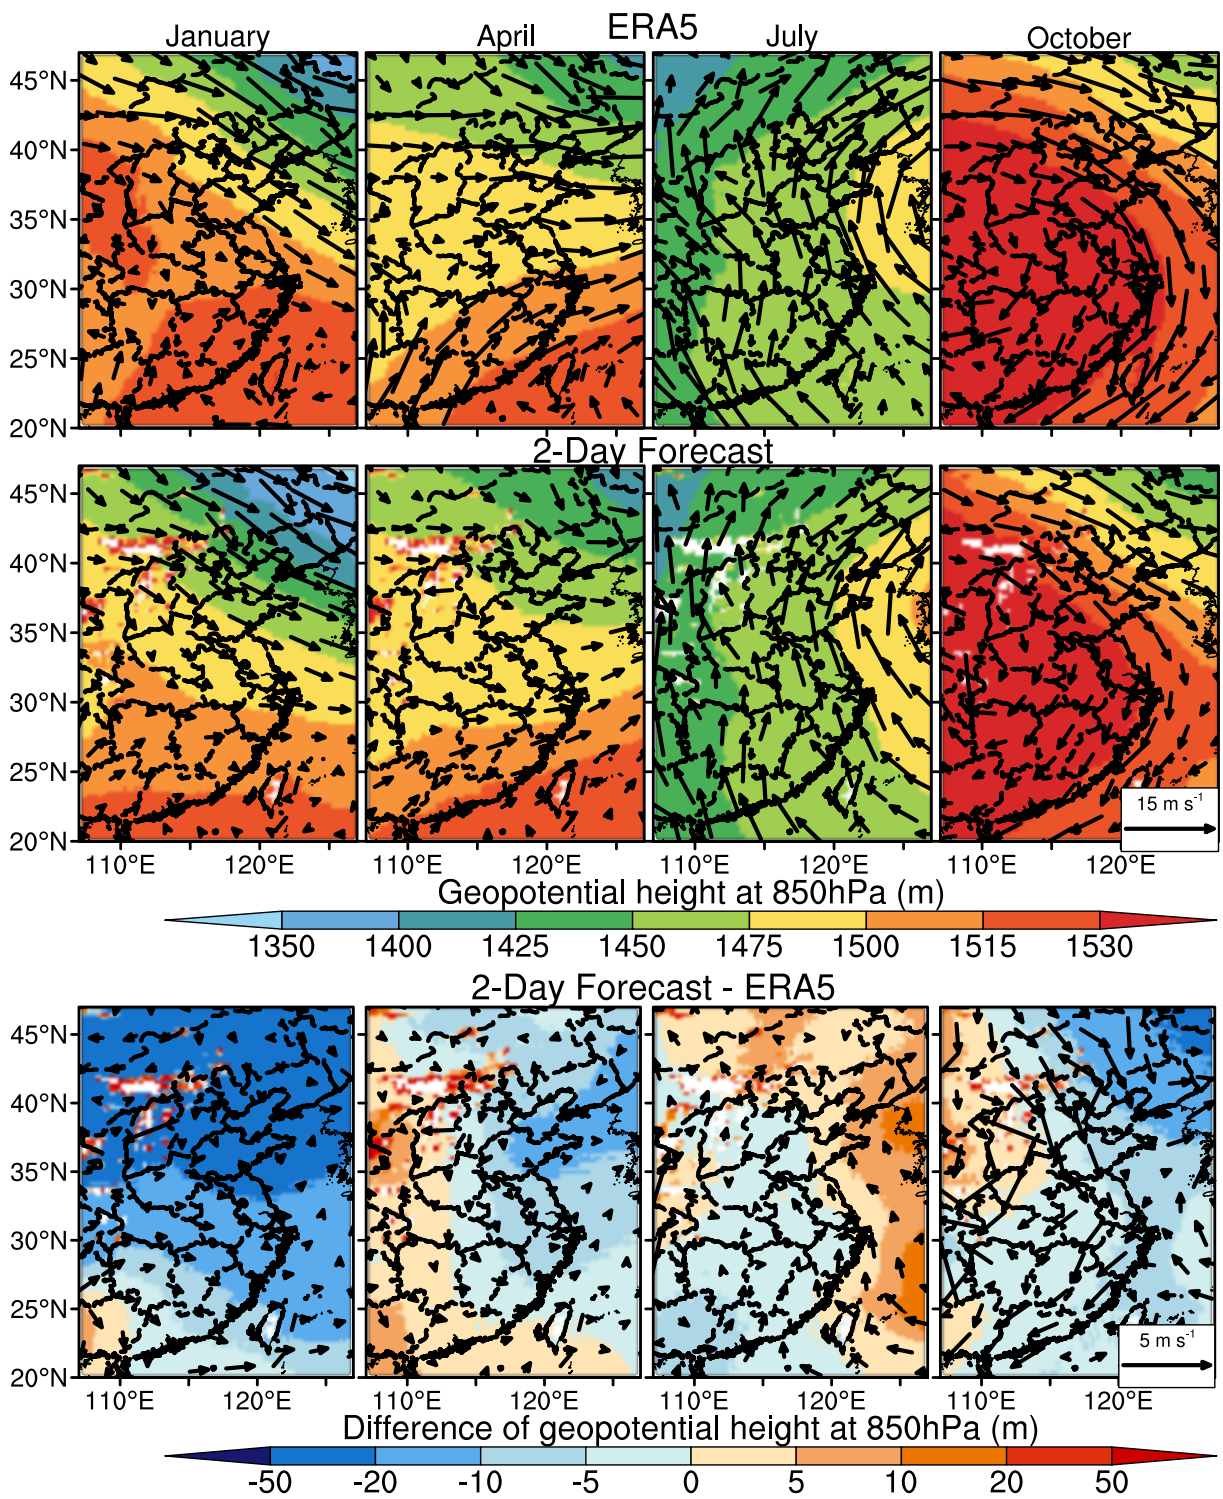

**Fig. S2.** Spatial distribution of 850-hPa geopotential height and wind from the ERA5 reanalysis dataset and the 2-Day forecast in January, April, July, and October of 2018.

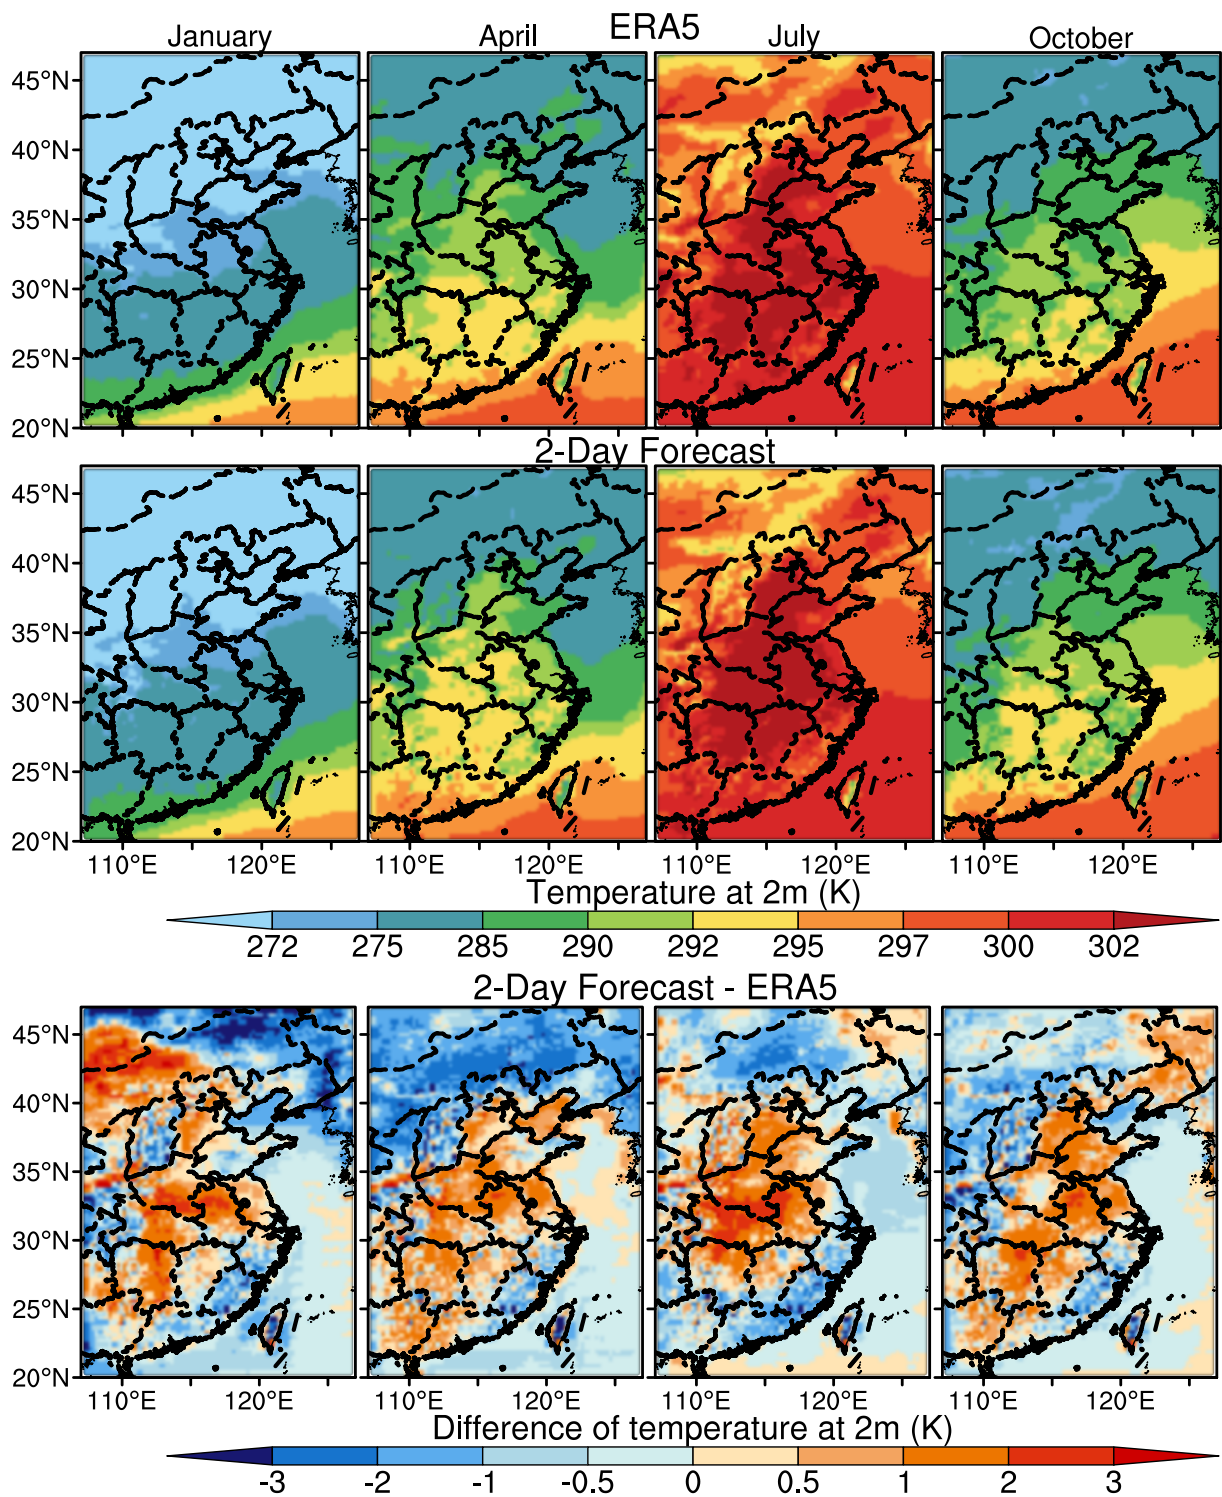

**Fig. S3.** Spatial distribution of 2-m temperature from the ERA5 reanalysis dataset and the 2-Day forecast in January, April, July, and October of 2018.

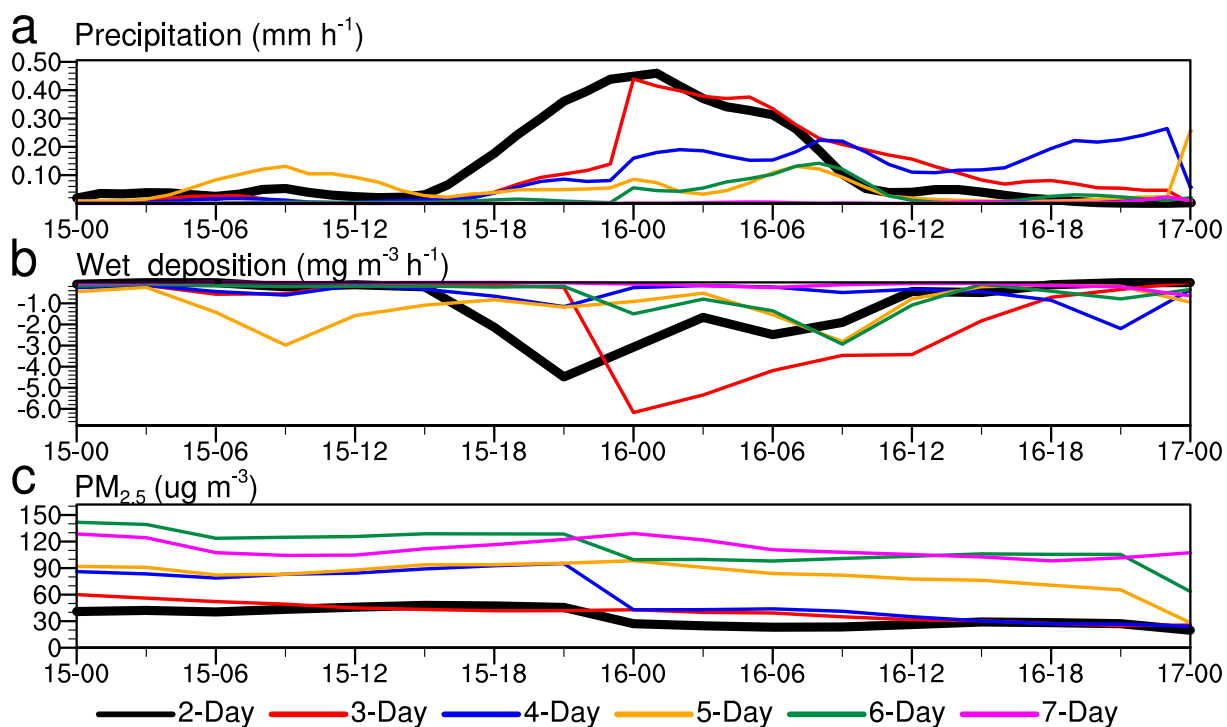

**Fig. S4.** (a) Time series of hourly precipitation, (b) contributions of wet deposition on surface  $\text{PM}_{2.5}$  concentrations, and (c) the surface  $\text{PM}_{2.5}$  concentrations over the BTH region from the 2-Day to 7-Day forecasts from 0000 UTC 15 October to 0000 UTC 17 October 2018.



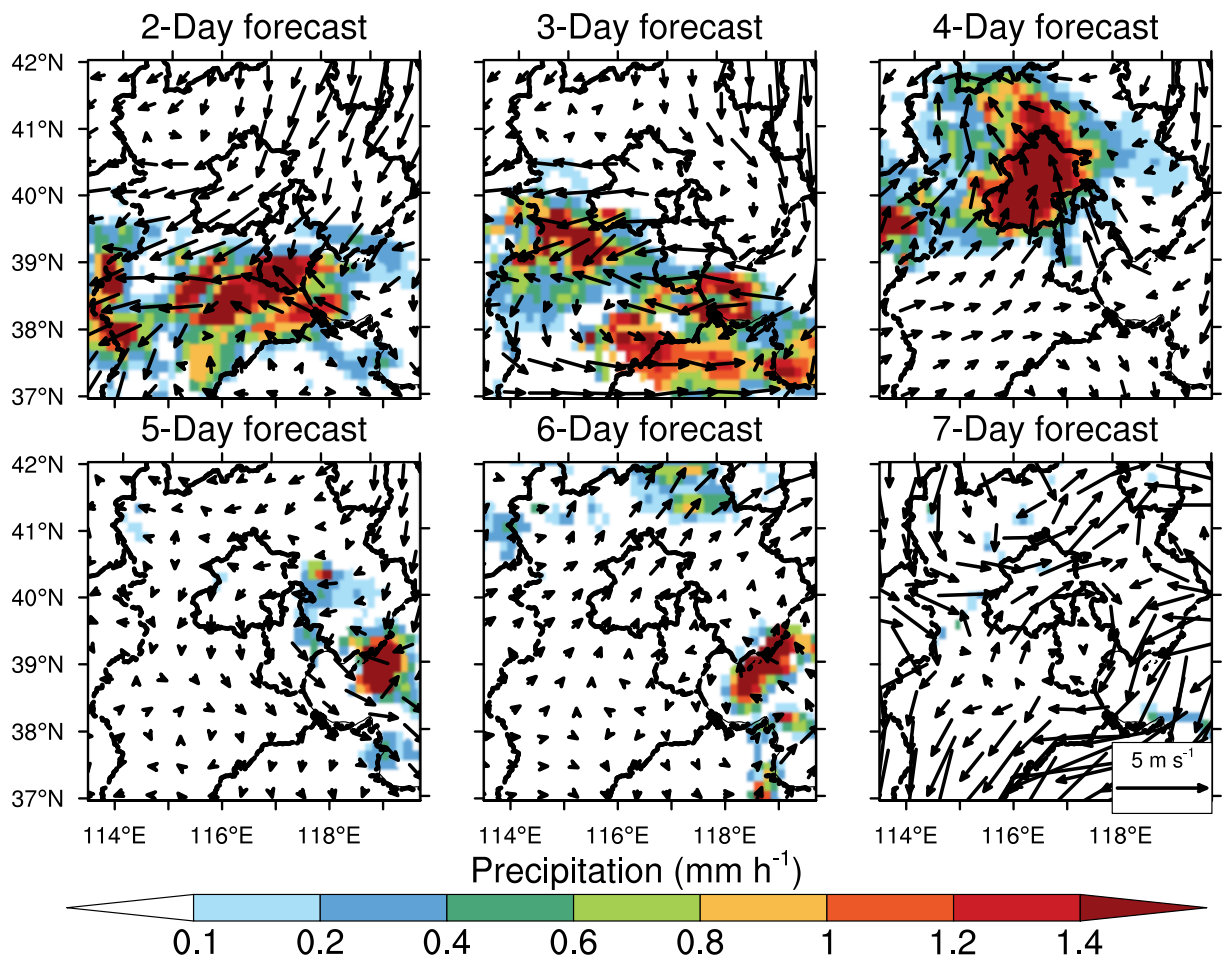

**Fig. S5.** Spatial distribution of hourly precipitation and 850-hPa wind fields from the 2-Day to 7-Day forecasts at 0200 UTC 16 October 2018.

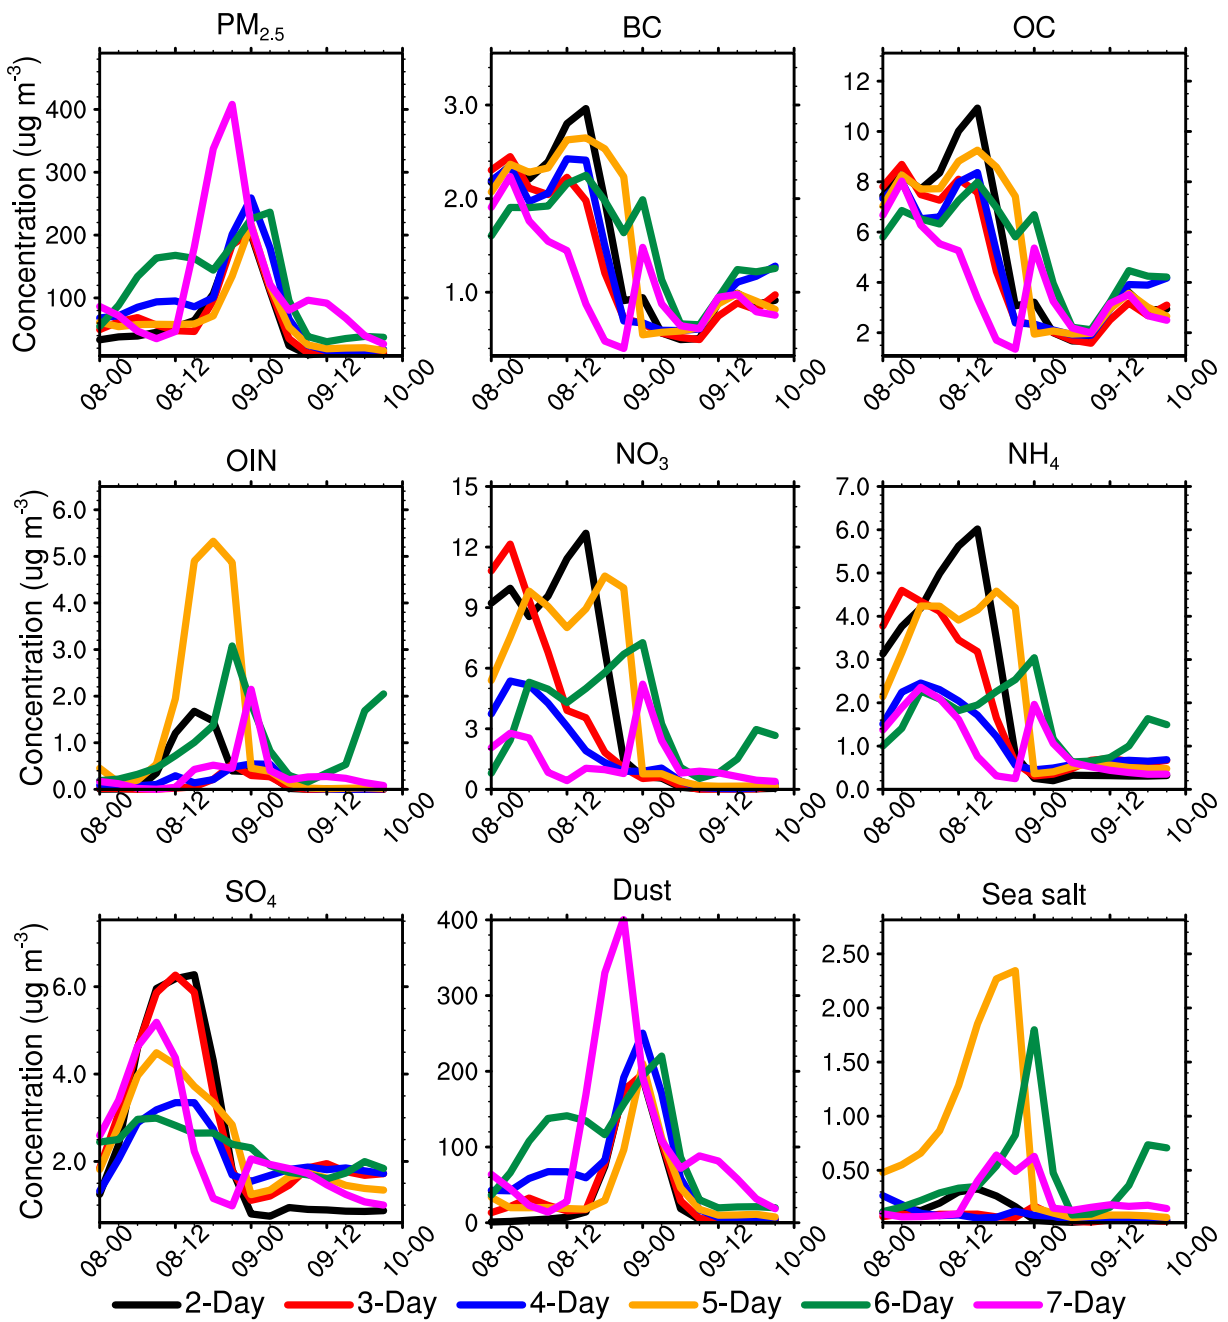

**Fig. S6.** Time series of surface concentrations of  $\text{PM}_{2.5}$  and  $\text{PM}_{2.5}$  compositions over the BTH region from the 2-Day to 7-Day forecasts during 0000 UTC 8 April to 0000 UTC 10 April 2018.

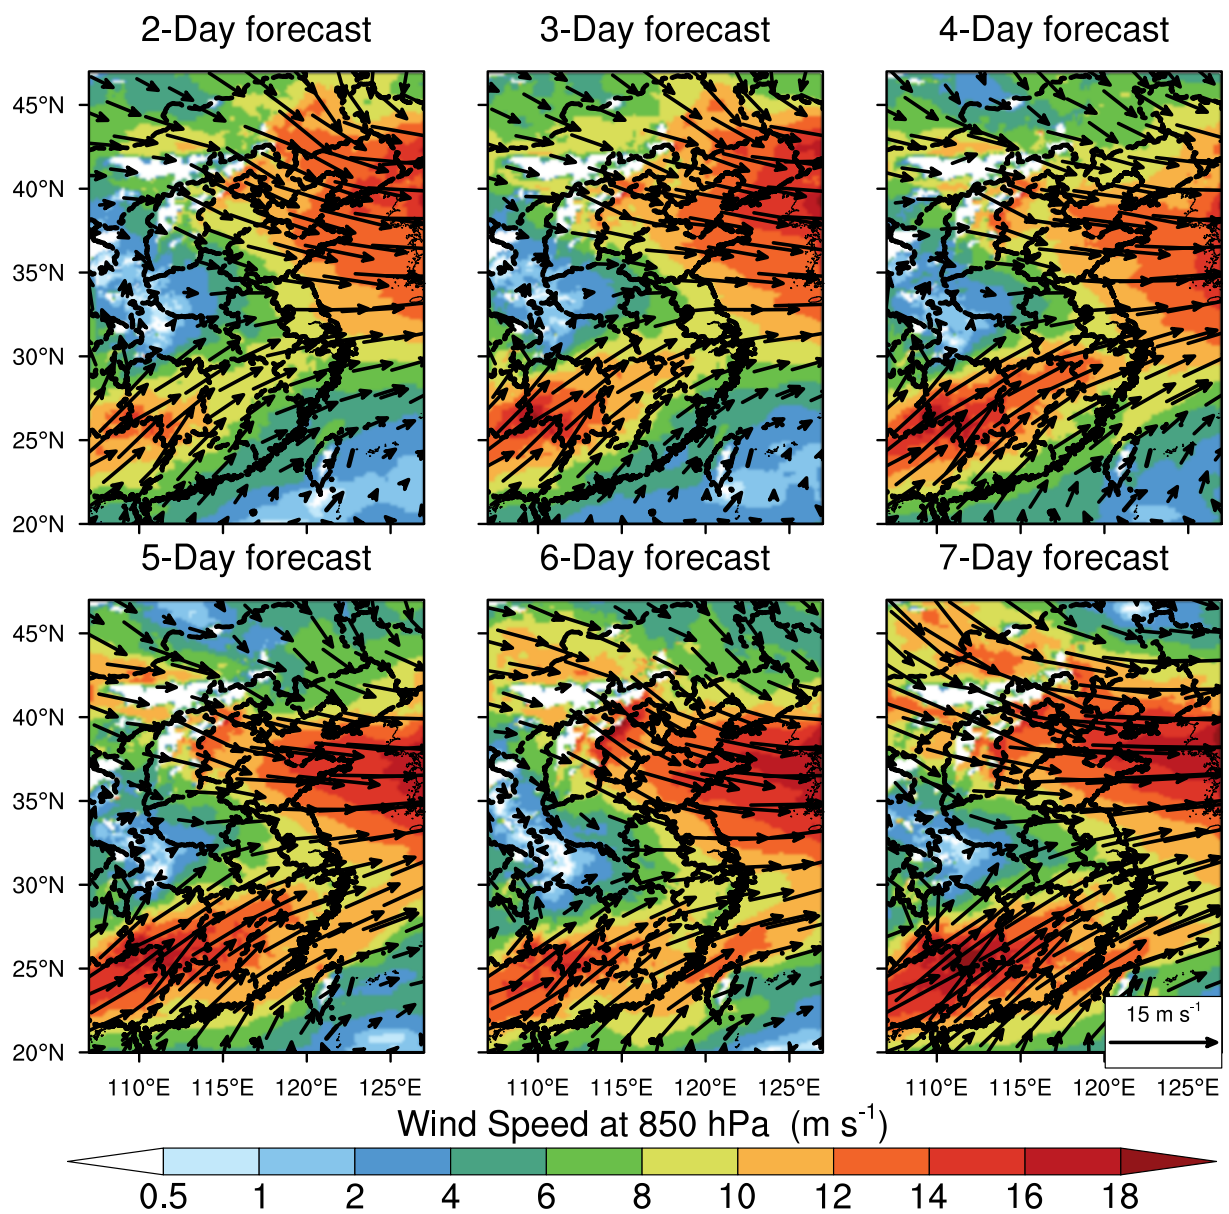

**Fig. S7.** Spatial distribution of the 850-hPa wind fields from the 2-Day to 7-Day forecasts from 0000 UTC 8 April to 0000 UTC 10 April 2018.

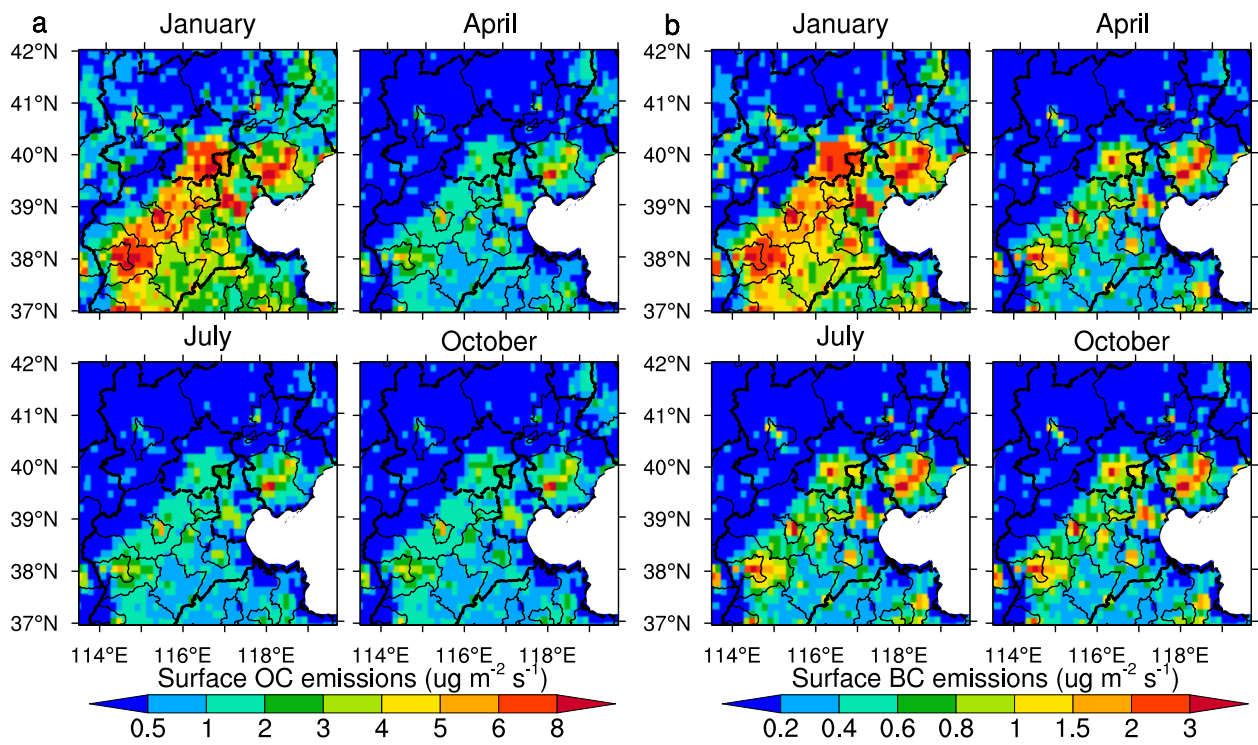

**Fig. S8.** Spatial distribution of anthropogenic emissions of (a) OC and (b) BC for January, April, July, and October of 2018.
